# Supplementary material for: Defining Pre-Asthma: A Systematic Review and Meta-Analysis Protocol for Multidimensional Early Prediction Models for Adult Asthma in Undiagnosed Populations
Source: Research Square preprint supplement (doi:10.21203/rs.3.rs-6750481/v1), 2025-08-14
Supplement: Supplementary file 1 [file 5d680377387e4cd0671f2c62.docx]

**Funding**

This work was supported by 1.3.5 project for disciplines of excellence-Clinical Research Fund, West China Hospital, Sichuan University (2023HXFH045), 1.3.5 project for disciplines of excellence, West China Hospital, Sichuan University (ZYGD23002), National Natural Science Foundation of China (82100032, 82200037,82300036).
